# Supplementary material
Source: PubMed Central journal article supplement (PMC3370101)
Supplement: NIHMS370350-supplement-1.pdf [file NIHMS370350-supplement-1.pdf]

## **ONLINE SUPPLEMENTAL DATA**

--Three Supplemental Figures

--One Supplemental Table I showing Microarray data.

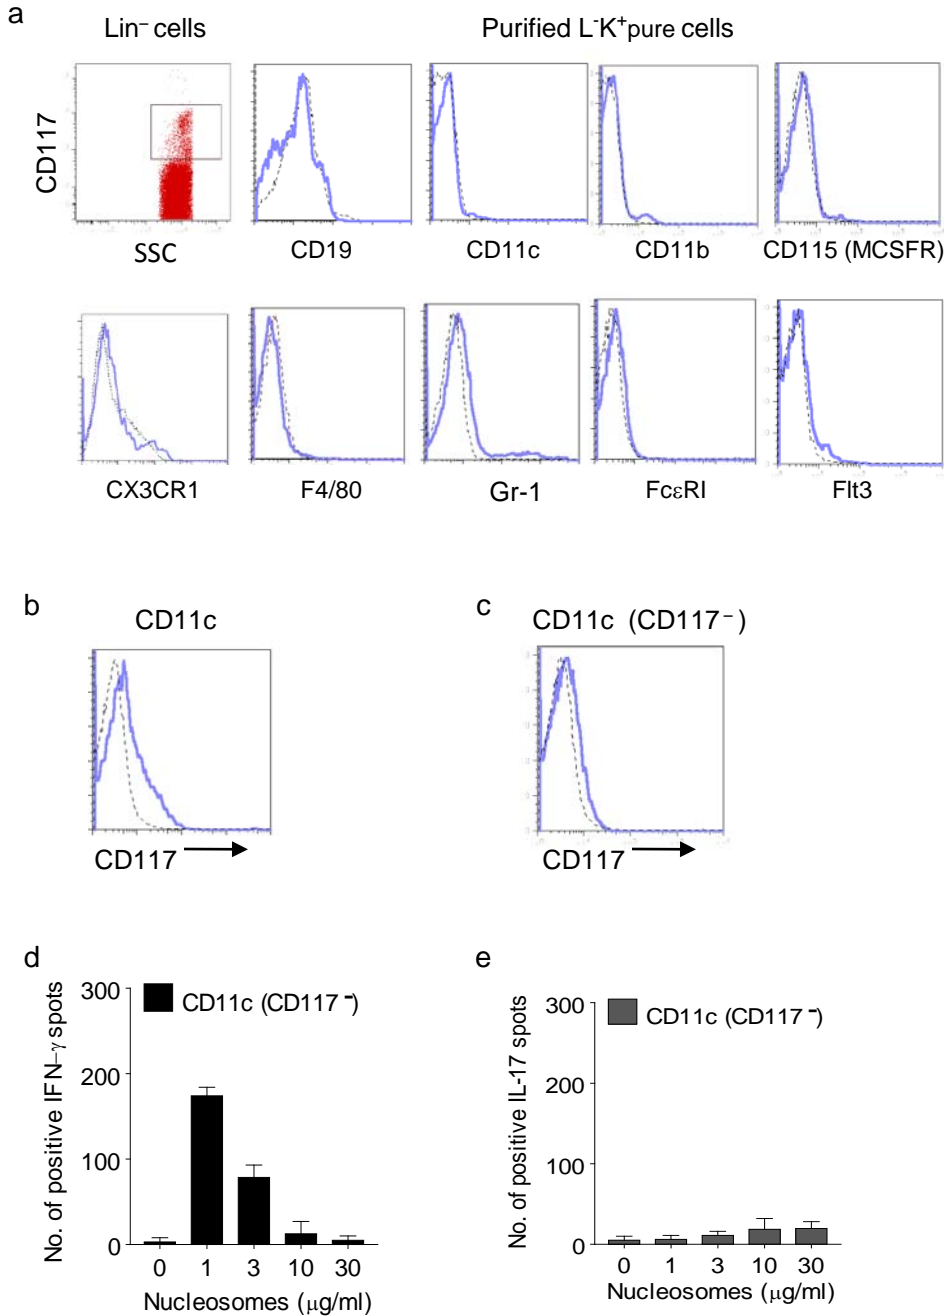

### Supplemental Figure 1.

L-K<sup>+</sup>pure cells lack conventional lineage markers (**a**), and c-Kit<sup>-</sup>DCs do not induce Th17 response (**b-e**). **a**, L-K<sup>+</sup>pure cells isolated after double depletion of other cell markers showed no expression of CD19, CD11c, CD11b, CD115, CX3CR1, F4/80, Gr-1, Fc $\epsilon$ RI or Flt3. **b**, DCs (CD11c<sup>+</sup>) isolated without prior depletion of c-Kit<sup>+</sup> cells contains c-Kit<sup>+</sup> cells. **c**, DCs after removal of c-Kit<sup>+</sup> cells contained no c-Kit<sup>+</sup> cells. **d-e**, DCs (c-Kit<sup>-</sup>) induced only Th1 response (**d**), but not Th17 response (**e**).

L-K<sup>+</sup>pure cells = Lin<sup>-</sup>c-Kit<sup>+</sup>pure cells; c-Kit = CD117. Mean  $\pm$  s.e.m of 3 experiments, n = 15 mice.

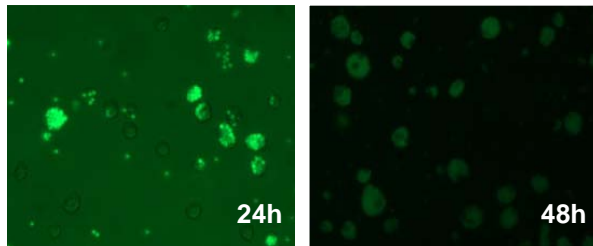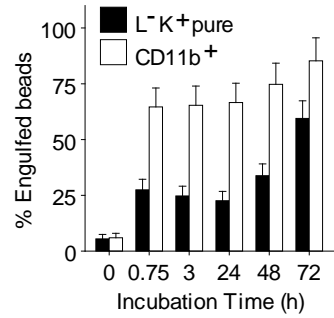

### ***Supplemental Figure 2***

Lin<sup>-</sup>Kit<sup>+</sup>pure cells have phagocytic ability for latex beads. Lin<sup>-</sup>Kit<sup>+</sup>pure cells cultured in SCF for 14 days were incubated with fluoresceinated latex beads (2.0 $\mu$ m diameter) and then analyzed for % of bead bound/engulfed by Lin<sup>-</sup>Kit<sup>+</sup>pure cells and CD11b<sup>+</sup> CD117<sup>low</sup> or <sup>-</sup> cells. (*Left*) Microscopic images of bead bound /engulfed cells shows quenching of the bead fluorescence. (*Right*) % of latex bead engulfed by Lin<sup>-</sup>Kit<sup>+</sup> cells or CD11b<sup>+</sup> cells in FACS analysis.

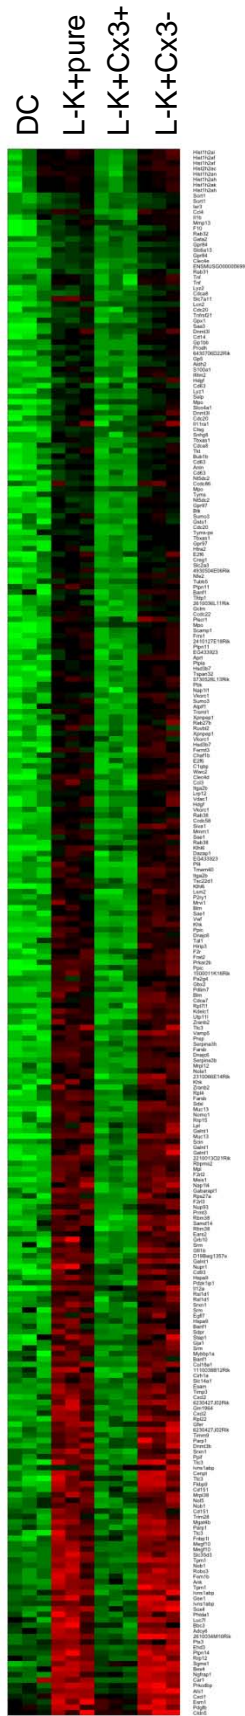

### Supplemental Figure 3A

Clustering analysis of 1,619 genes that were identified as being differentially expressed (up or down) on the basis of a statistically significant (raw  $P$ -value  $< 0.01$  and false discovery rate adjusted  $P$ -value  $< 0.05$ ), and 1.5-fold change (up or down) in expression level in at least one of the comparisons (see Methods). Each row represents a gene and each column represents each type of APC in triplicate (3 independent isolates). DC = dendritic cells.; L-K+pure= Lin<sup>-</sup>c-Kit<sup>+</sup>pure; L-K+Cx3<sup>-</sup> = Lin<sup>-</sup>c-Kit<sup>+</sup>CX3CR1<sup>-</sup> cells; L-K+Cx3<sup>+</sup> = Lin<sup>-</sup>c-Kit<sup>+</sup>CX3CR1<sup>+</sup> cells. CD11b<sup>+</sup>high (CD11c<sup>-</sup>c-Kit<sup>-</sup>/very low) cells are not shown but were similar to Lin<sup>-</sup>c-Kit<sup>+</sup>CX3CR1<sup>+</sup> cells.

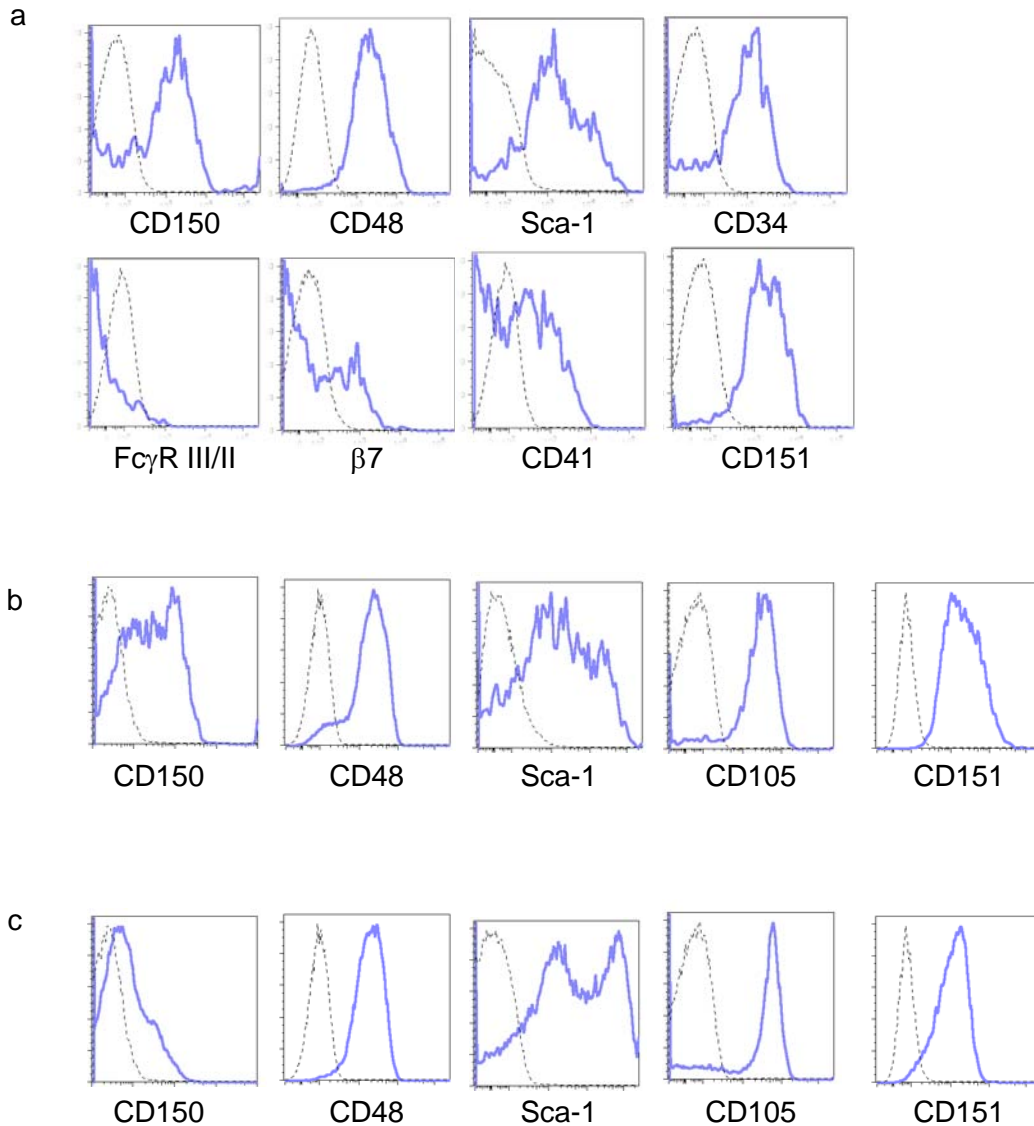

### **Supplemental Figure 3B**

Lin<sup>-</sup>c-Kit<sup>+</sup>pure cells express hematopoietic stem cell / progenitor related markers. Splenocytes were depleted for CD90, CD19, CD11c, CD11b, Gr-1, Fc $\epsilon$ RI, and then c-Kit<sup>+</sup> cells were positively selected, and stained for stem cell / progenitor related markers. **a**, Lin<sup>-</sup>c-Kit<sup>+</sup>pure cells expressed CD150, CD48, Sca-1, CD34, CD41 and other markers shown. **b**, Cell sorted, Lin<sup>-</sup>c-Kit<sup>+</sup>CD41<sup>+</sup> cells from cells in (**a**), expressed CD150, CD48, Sca-1, CD105, and CD151. This cell fraction displayed MkP/MEP like phenotype (Text Fig. 6) although it expressed Sca1. **c**, Lin<sup>-</sup>c-Kit<sup>+</sup> CD41<sup>-</sup>cells also expressed CD151 and CD48, Sca-1, and CD105, but not CD150. This fraction displayed MPP2 like phenotype as shown on the Text Fig. 6A-B.

**Supplemental Table I. Genes with significantly and differentially Up-regulated expression in all four Microarray comparisons**

(Purified Lin<sup>-</sup>c-Kit<sup>+</sup> pure cells = L<sup>-</sup>K<sup>+</sup>pure; Lin<sup>-</sup>c-Kit<sup>+</sup>CX3CR1<sup>-</sup> cell subset = L<sup>-</sup>K<sup>+</sup>Cx<sup>-</sup>; Lin<sup>-</sup>c-Kit<sup>+</sup>CX3CR1<sup>+</sup> subset = L<sup>-</sup>K<sup>+</sup>Cx<sup>+</sup>)

| <b>Symbol</b> | <b>EntrezID</b> | <b>L<sup>-</sup>K<sup>+</sup>pure vs.<br/>L<sup>-</sup>K<sup>+</sup>Cx<sup>+</sup><br/>Fold Change</b> | <b>L<sup>-</sup>K<sup>+</sup>Cx<sup>-</sup> vs.<br/>L<sup>-</sup>K<sup>+</sup>Cx<sup>+</sup><br/>Fold Change</b> | <b>L<sup>-</sup>K<sup>+</sup>pure vs.<br/>DC<br/>Fold Change</b> | <b>L<sup>-</sup>K<sup>+</sup>Cx<sup>-</sup> vs.<br/>DC<br/>Fold Change</b> | <b>L<sup>-</sup>K<sup>+</sup>pure vs.<br/>L<sup>-</sup>K<sup>+</sup>Cx<sup>+</sup><br/>P Value</b> | <b>L<sup>-</sup>K<sup>+</sup>Cx<sup>-</sup> vs.<br/>L<sup>-</sup>K<sup>+</sup>Cx<sup>+</sup><br/>P Value</b> | <b>L<sup>-</sup>K<sup>+</sup>pure vs.<br/>DC<br/>P Value</b> | <b>L<sup>-</sup>K<sup>+</sup>Cx<sup>-</sup> vs.<br/>DC<br/>P Value</b> |
|---------------|-----------------|--------------------------------------------------------------------------------------------------------|------------------------------------------------------------------------------------------------------------------|------------------------------------------------------------------|----------------------------------------------------------------------------|----------------------------------------------------------------------------------------------------|--------------------------------------------------------------------------------------------------------------|--------------------------------------------------------------|------------------------------------------------------------------------|
| Muc13         | 17063           | 5.29                                                                                                   | 6.74                                                                                                             | 17.4                                                             | 22.2                                                                       | 5.10E-07                                                                                           | 7.54E-08                                                                                                     | 1.62E-10                                                     | 4.40E-11                                                               |
| Pf4           | 56744           | 7.22                                                                                                   | 6.73                                                                                                             | 4.95                                                             | 4.61                                                                       | 2.79E-06                                                                                           | 4.45E-06                                                                                                     | 3.67E-05                                                     | 6.09E-05                                                               |
| Prkar2b       | 19088           | 6.46                                                                                                   | 6.06                                                                                                             | 6.66                                                             | 6.24                                                                       | 7.31E-07                                                                                           | 1.18E-06                                                                                                     | 5.87E-07                                                     | 9.40E-07                                                               |
| Car1          | 12346           | 4.71                                                                                                   | 6                                                                                                                | 2.93                                                             | 3.73                                                                       | 8.26E-05                                                                                           | 1.59E-05                                                                                                     | 0.00245                                                      | 0.000426                                                               |
| Serpina3h     | 546546          | 4.5                                                                                                    | 5.33                                                                                                             | 9.45                                                             | 11.2                                                                       | 0.000659                                                                                           | 0.000241                                                                                                     | 9.12E-06                                                     | 3.70E-06                                                               |
| Trem1         | 71326           | 5.38                                                                                                   | 5.1                                                                                                              | 5.41                                                             | 5.13                                                                       | 8.29E-05                                                                                           | 0.000116                                                                                                     | 8.03E-05                                                     | 0.000112                                                               |
| Vwf           | 22371           | 4.97                                                                                                   | 5.04                                                                                                             | 5                                                                | 5.06                                                                       | 6.82E-05                                                                                           | 6.27E-05                                                                                                     | 6.57E-05                                                     | 6.04E-05                                                               |
| Samd14        | 217125          | 4.21                                                                                                   | 4.74                                                                                                             | 3.47                                                             | 3.91                                                                       | 6.90E-05                                                                                           | 2.83E-05                                                                                                     | 0.000306                                                     | 0.000121                                                               |
| Itga2b        | 16399           | 3.73                                                                                                   | 4.38                                                                                                             | 3.57                                                             | 4.19                                                                       | 0.00123                                                                                            | 0.000444                                                                                                     | 0.00164                                                      | 0.000589                                                               |
| Cxcl2         | 20310           | 5.06                                                                                                   | 4.33                                                                                                             | 5.92                                                             | 5.06                                                                       | 6.03E-07                                                                                           | 2.30E-06                                                                                                     | 1.69E-07                                                     | 6.00E-07                                                               |
| Col18a1       | 12822           | 3.93                                                                                                   | 4.33                                                                                                             | 5.35                                                             | 5.9                                                                        | 2.93E-05                                                                                           | 1.30E-05                                                                                                     | 2.44E-06                                                     | 1.16E-06                                                               |
| Sdpr          | 20324           | 3.8                                                                                                    | 3.99                                                                                                             | 4.18                                                             | 4.4                                                                        | 0.000356                                                                                           | 0.000247                                                                                                     | 0.000179                                                     | 0.000125                                                               |
| Serpina3b     | 271047          | 3.69                                                                                                   | 3.89                                                                                                             | 3.65                                                             | 3.85                                                                       | 4.81E-05                                                                                           | 3.03E-05                                                                                                     | 5.25E-05                                                     | 3.30E-05                                                               |
| Gfi1b         | 14582           | 3                                                                                                      | 3.76                                                                                                             | 3.24                                                             | 4.07                                                                       | 0.000125                                                                                           | 1.53E-05                                                                                                     | 6.05E-05                                                     | 7.69E-06                                                               |
| Cd14          | 12475           | 2.77                                                                                                   | 3.76                                                                                                             | 4.09                                                             | 5.54                                                                       | 0.00197                                                                                            | 0.000184                                                                                                     | 9.70E-05                                                     | 1.04E-05                                                               |
| Tmem40        | 94346           | 3.05                                                                                                   | 3.57                                                                                                             | 3.13                                                             | 3.67                                                                       | 1.33E-07                                                                                           | 1.96E-08                                                                                                     | 9.38E-08                                                     | 1.43E-08                                                               |
| Nfe2          | 18022           | 2.74                                                                                                   | 3.56                                                                                                             | 3.2                                                              | 4.16                                                                       | 3.23E-06                                                                                           | 1.42E-07                                                                                                     | 4.83E-07                                                     | 2.68E-08                                                               |
| Ppic          | 19038           | 3.43                                                                                                   | 3.44                                                                                                             | 10.2                                                             | 10.3                                                                       | 3.44E-07                                                                                           | 3.29E-07                                                                                                     | 2.23E-11                                                     | 2.17E-11                                                               |
| Cdca7         | 66953           | 2.41                                                                                                   | 3.32                                                                                                             | 3.08                                                             | 4.24                                                                       | 3.18E-05                                                                                           | 6.40E-07                                                                                                     | 1.56E-06                                                     | 4.75E-08                                                               |
| Cxcl1         | 14825           | 3.87                                                                                                   | 3.3                                                                                                              | 4.49                                                             | 3.83                                                                       | 3.00E-07                                                                                           | 1.64E-06                                                                                                     | 6.82E-08                                                     | 3.34E-07                                                               |
| Ahi1          | 52906           | 2.37                                                                                                   | 3.23                                                                                                             | 2.31                                                             | 3.14                                                                       | 1.04E-05                                                                                           | 1.86E-07                                                                                                     | 1.54E-05                                                     | 2.62E-07                                                               |
| F2rl2         | 14064           | 2.99                                                                                                   | 3.22                                                                                                             | 3.51                                                             | 3.77                                                                       | 4.00E-04                                                                                           | 0.000212                                                                                                     | 0.000102                                                     | 5.52E-05                                                               |
| Tpm1          | 22003           | 2.76                                                                                                   | 3.17                                                                                                             | 2.59                                                             | 2.99                                                                       | 2.30E-06                                                                                           | 4.08E-07                                                                                                     | 5.10E-06                                                     | 8.56E-07                                                               |
| Timp3         | 21859           | 3.2                                                                                                    | 3.14                                                                                                             | 3.4                                                              | 3.33                                                                       | 8.39E-05                                                                                           | 0.000102                                                                                                     | 4.83E-05                                                     | 5.82E-05                                                               |

|               |        |      |      |      |      |          |          |          |          |
|---------------|--------|------|------|------|------|----------|----------|----------|----------|
| F2rl3         | 14065  | 2.68 | 2.98 | 3.56 | 3.96 | 3.81E-05 | 1.17E-05 | 1.77E-06 | 6.11E-07 |
| Clec4d        | 17474  | 2.81 | 2.89 | 3.4  | 3.51 | 5.27E-06 | 3.67E-06 | 5.61E-07 | 4.02E-07 |
| Meis1         | 17268  | 2.69 | 2.84 | 3.82 | 4.04 | 2.96E-05 | 1.59E-05 | 6.54E-07 | 3.82E-07 |
| Scin          | 20259  | 2.36 | 2.81 | 2.5  | 2.97 | 0.000595 | 9.67E-05 | 0.000328 | 5.43E-05 |
| Slc2a3        | 20527  | 2.9  | 2.73 | 2.62 | 2.46 | 0.000355 | 0.000618 | 0.000882 | 0.00154  |
| Esam          | 69524  | 2.86 | 2.63 | 3.43 | 3.15 | 0.000412 | 0.000896 | 8.19E-05 | 0.000175 |
| Scamp1        | 107767 | 2.64 | 2.62 | 4.43 | 4.4  | 5.50E-07 | 6.08E-07 | 1.04E-09 | 1.12E-09 |
| Lyz2          | 17105  | 2.53 | 2.61 | 5.14 | 5.31 | 0.000428 | 0.000305 | 5.76E-07 | 4.37E-07 |
| Gp5           | 14729  | 2.54 | 2.59 | 2.53 | 2.57 | 0.00529  | 0.00464  | 0.00551  | 0.00483  |
| P2ry1         | 18441  | 2.15 | 2.56 | 1.96 | 2.32 | 0.0027   | 0.000489 | 0.00695  | 0.00127  |
| Mpl           | 17480  | 2.51 | 2.55 | 3.14 | 3.2  | 0.000453 | 0.000379 | 4.76E-05 | 4.02E-05 |
| Lyz1          | 17110  | 2.28 | 2.55 | 4.82 | 5.37 | 0.0051   | 0.00203  | 1.08E-05 | 4.76E-06 |
| Nt5dc2        | 70021  | 1.91 | 2.5  | 2.26 | 2.96 | 7.22E-05 | 1.04E-06 | 4.66E-06 | 9.92E-08 |
| Ehd3          | 57440  | 2.25 | 2.49 | 1.93 | 2.14 | 5.98E-05 | 1.51E-05 | 0.000503 | 0.000118 |
| Gata2         | 14461  | 1.52 | 2.49 | 1.76 | 2.88 | 0.0673   | 0.000505 | 0.0173   | 0.000117 |
| Tnf           | 21926  | 2.03 | 2.47 | 1.69 | 2.06 | 0.000306 | 2.20E-05 | 0.00368  | 0.00024  |
| F2r           | 14062  | 2.14 | 2.46 | 3.56 | 4.09 | 0.0206   | 0.00769  | 0.000511 | 0.000186 |
| 2610034M16Rik | 69239  | 1.97 | 2.44 | 2.02 | 2.49 | 1.18E-09 | 1.60E-11 | 7.09E-10 | 1.06E-11 |
| Ccl4          | 20303  | 2.09 | 2.42 | 1.58 | 1.82 | 0.00354  | 0.000847 | 0.0534   | 0.0142   |
| Mmp13         | 17386  | 1.8  | 2.39 | 6.03 | 8.01 | 0.166    | 0.046    | 0.000341 | 7.60E-05 |
| Gpr97         | 54672  | 2.2  | 2.36 | 3.07 | 3.28 | 1.35E-08 | 3.88E-09 | 6.02E-11 | 2.33E-11 |
| Bex4          | 406217 | 2.16 | 2.32 | 2.05 | 2.21 | 2.46E-08 | 6.15E-09 | 6.33E-08 | 1.49E-08 |
| Ppif          | 105675 | 2.26 | 2.32 | 1.96 | 2.01 | 0.00147  | 0.00111  | 0.0063   | 0.00479  |
| Pdzk1ip1      | 67182  | 2.11 | 2.32 | 1.96 | 2.16 | 0.0098   | 0.00439  | 0.0181   | 0.00824  |
| Fermt3        | 108101 | 2.06 | 2.29 | 2.44 | 2.71 | 0.00094  | 0.000263 | 0.000121 | 3.56E-05 |
| Blm           | 12144  | 2    | 2.27 | 1.9  | 2.15 | 7.79E-07 | 7.86E-08 | 2.28E-06 | 2.08E-07 |
| Hist1h2af     | 319173 | 2.01 | 2.27 | 1.67 | 1.88 | 0.000893 | 0.000204 | 0.00886  | 0.00203  |
| Ifitm2        | 80876  | 1.84 | 2.26 | 2.4  | 2.96 | 0.000341 | 1.46E-05 | 6.05E-06 | 3.78E-07 |
| Hsd3b7        | 101502 | 1.94 | 2.25 | 2.91 | 3.37 | 9.05E-06 | 6.78E-07 | 1.31E-08 | 1.84E-09 |
| Il1b          | 16176  | 1.76 | 2.25 | 1.63 | 2.08 | 0.0365   | 0.00463  | 0.0664   | 0.00899  |

|           |        |      |      |      |      |          |          |          |          |
|-----------|--------|------|------|------|------|----------|----------|----------|----------|
| Gclm      | 14630  | 2.64 | 2.24 | 2.52 | 2.13 | 1.62E-06 | 1.70E-05 | 3.07E-06 | 3.42E-05 |
| Hist1h2an | 319170 | 2.23 | 2.24 | 1.79 | 1.8  | 0.000466 | 0.000439 | 0.00598  | 0.00565  |
| Hist1h2ah | 319168 | 2.06 | 2.23 | 2.02 | 2.18 | 0.00222  | 0.00094  | 0.00281  | 0.00119  |
| Sdsl      | 257635 | 1.92 | 2.22 | 2.11 | 2.44 | 2.16E-06 | 1.45E-07 | 3.64E-07 | 2.95E-08 |
| Rab38     | 72433  | 2.1  | 2.22 | 3.11 | 3.27 | 0.00314  | 0.00185  | 6.42E-05 | 3.88E-05 |
| Galnt1    | 14423  | 1.96 | 2.21 | 2.26 | 2.56 | 6.76E-05 | 9.99E-06 | 6.95E-06 | 1.18E-06 |
| Tal1      | 21349  | 2.2  | 2.2  | 2.02 | 2.01 | 0.00055  | 0.000566 | 0.00154  | 0.00158  |
| Aldh2     | 11669  | 2.26 | 2.19 | 3.3  | 3.19 | 2.75E-05 | 4.37E-05 | 2.12E-07 | 3.12E-07 |
| Gp1bb     | 14724  | 2.07 | 2.18 | 1.96 | 2.06 | 0.00867  | 0.00552  | 0.014    | 0.00897  |
| Sox4      | 20677  | 1.9  | 2.17 | 2.28 | 2.6  | 1.17E-06 | 9.14E-08 | 3.69E-08 | 4.11E-09 |
| Dnmt3b    | 13436  | 1.96 | 2.17 | 2.46 | 2.71 | 0.000156 | 3.48E-05 | 5.79E-06 | 1.49E-06 |
| C1qbp     | 12261  | 1.86 | 2.17 | 1.67 | 1.95 | 0.000404 | 4.08E-05 | 0.0021   | 2.00E-04 |
| Slc35d3   | 76157  | 2.5  | 2.17 | 2.73 | 2.37 | 1.21E-05 | 7.95E-05 | 3.89E-06 | 2.39E-05 |
| Cd63      | 12512  | 1.82 | 2.15 | 2.39 | 2.82 | 4.21E-05 | 2.11E-06 | 3.66E-07 | 3.01E-08 |
| Nomo1     | 211548 | 2.17 | 2.14 | 2.47 | 2.44 | 0.000127 | 0.000152 | 2.38E-05 | 2.82E-05 |
| Clec4e    | 56619  | 1.97 | 2.14 | 2.06 | 2.23 | 0.0029   | 0.00121  | 0.00182  | 0.000759 |
| Mpo       | 17523  | 1.85 | 2.13 | 15.7 | 18.2 | 0.00647  | 0.00133  | 7.64E-11 | 3.38E-11 |
| Nupr1     | 56312  | 3.85 | 2.13 | 6.17 | 3.41 | 2.83E-05 | 0.00579  | 6.51E-07 | 8.15E-05 |
| Cenpt     | 320394 | 1.92 | 2.11 | 1.96 | 2.16 | 6.87E-08 | 8.61E-09 | 4.14E-08 | 5.45E-09 |
| Pbk       | 52033  | 1.84 | 2.09 | 2.13 | 2.41 | 5.46E-05 | 6.28E-06 | 4.51E-06 | 6.20E-07 |
| Hist1h2ak | 319169 | 2.01 | 2.09 | 2.07 | 2.16 | 0.00293  | 0.00187  | 0.00206  | 0.00131  |
| Ptpn14    | 19250  | 2.28 | 2.08 | 2.36 | 2.15 | 4.73E-07 | 2.32E-06 | 2.67E-07 | 1.26E-06 |
| Hist2h2ac | 319176 | 1.81 | 2.07 | 1.52 | 1.74 | 0.000862 | 0.000126 | 0.0113   | 0.00164  |
| Adcy6     | 11512  | 1.98 | 2.07 | 1.64 | 1.71 | 0.000496 | 0.000268 | 0.0066   | 0.00357  |
| Atpif1    | 11983  | 1.83 | 2.07 | 2.09 | 2.36 | 0.00363  | 0.000797 | 0.000705 | 0.000157 |
| Siva1     | 30954  | 1.59 | 2.06 | 1.69 | 2.19 | 0.000129 | 6.50E-07 | 3.37E-05 | 2.13E-07 |
| Nap1l4    | 17955  | 1.87 | 2.06 | 1.97 | 2.17 | 3.62E-05 | 6.34E-06 | 1.43E-05 | 2.63E-06 |
| Pdlim7    | 67399  | 2.41 | 2.06 | 3.22 | 2.75 | 4.40E-06 | 4.57E-05 | 9.21E-08 | 6.83E-07 |
| Slco4a1   | 108115 | 1.95 | 2.06 | 1.89 | 2    | 0.00027  | 0.000117 | 0.000423 | 0.000182 |
| Vamp5     | 53620  | 1.74 | 2.05 | 1.9  | 2.24 | 1.92E-08 | 3.74E-10 | 2.16E-09 | 6.14E-11 |



|               |        |      |      |      |      |          |          |          |          |
|---------------|--------|------|------|------|------|----------|----------|----------|----------|
| Cldn5         | 12741  | 1.72 | 2.05 | 2.03 | 2.41 | 0.00154  | 0.00012  | 0.000136 | 1.20E-05 |
| Hdgf          | 15191  | 1.93 | 2.04 | 2.4  | 2.54 | 0.000163 | 6.90E-05 | 6.16E-06 | 2.82E-06 |
| Ccl3          | 20302  | 2.17 | 2.04 | 2.22 | 2.09 | 7.34E-05 | 0.000176 | 5.46E-05 | 0.00013  |
| Aprt          | 11821  | 1.69 | 2.03 | 1.91 | 2.3  | 4.95E-05 | 1.16E-06 | 3.92E-06 | 1.28E-07 |
| Srm           | 20810  | 1.99 | 2.03 | 1.91 | 1.95 | 0.000277 | 0.000207 | 0.000493 | 0.000366 |
| 2610036L11Rik | 66311  | 1.8  | 2.01 | 1.98 | 2.21 | 5.12E-05 | 6.65E-06 | 8.92E-06 | 1.30E-06 |
| Tspan32       | 27027  | 1.94 | 2    | 2.48 | 2.56 | 2.02E-07 | 1.03E-07 | 1.89E-09 | 1.10E-09 |
| Wwc2          | 52357  | 1.89 | 1.99 | 2.09 | 2.2  | 4.53E-05 | 1.87E-05 | 8.19E-06 | 3.55E-06 |
| Dnmt3l        | 54427  | 1.74 | 1.98 | 2.65 | 3.03 | 0.002    | 0.000293 | 5.75E-06 | 1.10E-06 |
| Nop58         | 55989  | 1.9  | 1.98 | 1.77 | 1.85 | 0.00123  | 0.000714 | 0.00305  | 0.00177  |
| Frrs1         | 20321  | 1.95 | 1.97 | 2.42 | 2.45 | 4.26E-07 | 3.50E-07 | 7.72E-09 | 6.56E-09 |
| Rbm38         | 56190  | 1.76 | 1.97 | 1.56 | 1.75 | 0.000106 | 1.30E-05 | 0.000982 | 0.000109 |
| Rbpms2        | 71973  | 2.03 | 1.97 | 2.06 | 2.01 | 0.00168  | 0.00228  | 0.00139  | 0.00189  |
| Selp          | 20344  | 2.21 | 1.97 | 2.17 | 1.94 | 0.00688  | 0.0177   | 0.00792  | 0.0203   |
| Gabarapl1     | 57436  | 2.02 | 1.96 | 1.89 | 1.83 | 3.48E-07 | 6.30E-07 | 1.40E-06 | 2.64E-06 |
| Rab31         | 106572 | 1.51 | 1.96 | 1.96 | 2.55 | 0.00302  | 2.71E-05 | 2.63E-05 | 4.07E-07 |
| Esm1          | 71690  | 2.04 | 1.96 | 3.07 | 2.94 | 4.01E-05 | 7.91E-05 | 1.24E-07 | 2.15E-07 |
| Gja1          | 14609  | 1.94 | 1.96 | 2.82 | 2.85 | 0.000209 | 0.000181 | 1.12E-06 | 9.91E-07 |
| Hist1h2ai     | 319191 | 1.8  | 1.96 | 1.6  | 1.75 | 0.00118  | 0.00034  | 0.0064   | 0.00185  |
| 2010107H07Rik | 66487  | 1.57 | 1.95 | 1.86 | 2.32 | 0.000114 | 9.33E-07 | 2.52E-06 | 3.79E-08 |
| Grb10         | 14783  | 2.37 | 1.93 | 2.75 | 2.24 | 2.57E-07 | 9.25E-06 | 2.67E-08 | 6.76E-07 |
| Gbx2          | 14472  | 2.03 | 1.93 | 2.09 | 1.99 | 0.000105 | 0.000222 | 6.68E-05 | 0.00014  |
| Gpx1          | 14775  | 1.63 | 1.92 | 1.6  | 1.89 | 0.00388  | 0.000331 | 0.00474  | 0.000403 |
| Cd151         | 12476  | 1.9  | 1.92 | 2.15 | 2.17 | 0.00376  | 0.00336  | 0.000925 | 0.000828 |
| Gsto1         | 14873  | 1.74 | 1.9  | 1.96 | 2.14 | 0.0029   | 0.000833 | 0.000562 | 0.000164 |
| Cd93          | 17064  | 1.63 | 1.89 | 2.34 | 2.71 | 0.000159 | 8.27E-06 | 1.75E-07 | 1.76E-08 |
| Vkorc1        | 27973  | 1.75 | 1.89 | 1.91 | 2.06 | 0.000336 | 9.44E-05 | 7.53E-05 | 2.21E-05 |
| Ccdc86        | 108673 | 1.61 | 1.89 | 1.54 | 1.8  | 0.0029   | 0.000238 | 0.0062   | 0.000508 |
| Timm9         | 30056  | 1.9  | 1.89 | 2.07 | 2.06 | 0.00348  | 0.0036   | 0.00129  | 0.00133  |
| Dnajc6        | 72685  | 1.97 | 1.87 | 2.17 | 2.06 | 1.48E-07 | 4.50E-07 | 2.19E-08 | 6.08E-08 |

|               |        |      |      |      |      |          |          |          |          |
|---------------|--------|------|------|------|------|----------|----------|----------|----------|
| Chaf1b        | 110749 | 1.63 | 1.87 | 1.64 | 1.88 | 0.00025  | 1.63E-05 | 0.000223 | 1.47E-05 |
| Gar1          | 68147  | 1.82 | 1.87 | 1.92 | 1.97 | 0.000485 | 0.000333 | 0.000214 | 0.000148 |
| Fam65a        | 75687  | 1.57 | 1.86 | 1.52 | 1.81 | 1.22E-05 | 1.78E-07 | 2.62E-05 | 3.40E-07 |
| Egfl7         | 353156 | 1.7  | 1.86 | 1.98 | 2.17 | 0.000344 | 6.41E-05 | 2.31E-05 | 4.85E-06 |
| Tymmps        | 22172  | 1.63 | 1.86 | 1.5  | 1.71 | 0.0011   | 0.000112 | 0.00503  | 0.000503 |
| Khk           | 16548  | 1.66 | 1.85 | 1.75 | 1.95 | 3.89E-06 | 2.94E-07 | 1.07E-06 | 9.18E-08 |
| Trim28        | 21849  | 1.65 | 1.85 | 1.61 | 1.8  | 0.00442  | 0.000883 | 0.00645  | 0.0013   |
| Tnfrsf21      | 94185  | 1.73 | 1.84 | 2.1  | 2.24 | 0.000162 | 4.91E-05 | 4.80E-06 | 1.65E-06 |
| Fnbp1l        | 214459 | 1.75 | 1.84 | 2.35 | 2.46 | 0.00119  | 0.000574 | 1.60E-05 | 8.27E-06 |
| 1110038B12Rik | 68763  | 1.97 | 1.83 | 1.65 | 1.53 | 3.73E-06 | 1.61E-05 | 0.000132 | 0.000662 |
| Lpl           | 16956  | 1.62 | 1.83 | 2.08 | 2.36 | 0.0323   | 0.00913  | 0.00241  | 0.000639 |
| Prkcdbp       | 109042 | 1.74 | 1.82 | 1.86 | 1.94 | 2.44E-07 | 8.65E-08 | 4.92E-08 | 1.88E-08 |
| Rpl7l1        | 66229  | 1.56 | 1.82 | 1.53 | 1.78 | 0.000127 | 4.14E-06 | 0.000215 | 6.68E-06 |
| Parp1         | 11545  | 1.7  | 1.82 | 1.61 | 1.73 | 4.30E-05 | 1.06E-05 | 0.000133 | 3.12E-05 |
| Ank           | 11732  | 1.82 | 1.82 | 2.2  | 2.19 | 0.000856 | 0.000892 | 5.69E-05 | 5.92E-05 |
| Ptpla         | 30963  | 1.74 | 1.81 | 1.8  | 1.87 | 6.17E-07 | 2.61E-07 | 2.84E-07 | 1.23E-07 |
| Srxn1         | 76650  | 2.2  | 1.81 | 1.95 | 1.61 | 1.21E-05 | 0.000262 | 8.17E-05 | 0.00199  |
| 6230427J02Rik | 68176  | 1.58 | 1.8  | 1.53 | 1.74 | 3.48E-05 | 1.64E-06 | 8.49E-05 | 3.66E-06 |
| S100a1        | 20193  | 1.65 | 1.8  | 2.26 | 2.46 | 3.00E-04 | 5.79E-05 | 1.07E-06 | 2.73E-07 |
| Plscr1        | 22038  | 1.6  | 1.8  | 1.97 | 2.22 | 0.00716  | 0.00132  | 0.000371 | 7.09E-05 |
| Btk           | 12229  | 1.6  | 1.79 | 1.68 | 1.88 | 2.19E-05 | 1.47E-06 | 6.87E-06 | 5.15E-07 |
| Lrp12         | 239393 | 1.59 | 1.79 | 2.02 | 2.26 | 0.00156  | 0.000214 | 2.73E-05 | 4.45E-06 |
| Nap1l1        | 53605  | 1.67 | 1.77 | 1.64 | 1.74 | 0.000169 | 5.08E-05 | 0.000238 | 7.10E-05 |
| Rrp12         | 107094 | 1.69 | 1.77 | 1.6  | 1.67 | 0.000543 | 0.000255 | 0.00145  | 0.000675 |
| Tyms          | 22171  | 1.7  | 1.77 | 1.84 | 1.91 | 0.00139  | 0.000776 | 0.000425 | 0.000239 |
| Lsm2          | 27756  | 1.62 | 1.76 | 1.51 | 1.65 | 8.51E-06 | 1.11E-06 | 4.92E-05 | 5.70E-06 |
| Klhdc10       | 76788  | 1.76 | 1.76 | 2    | 2    | 4.16E-06 | 4.24E-06 | 2.62E-07 | 2.67E-07 |
| Tfdp1         | 21781  | 1.71 | 1.76 | 1.98 | 2.04 | 3.10E-05 | 1.65E-05 | 1.68E-06 | 9.55E-07 |
| Rpl22         | 19934  | 1.7  | 1.76 | 1.91 | 1.97 | 3.25E-05 | 1.70E-05 | 2.97E-06 | 1.64E-06 |
| Xpnpep1       | 170750 | 1.59 | 1.76 | 1.98 | 2.19 | 0.0114   | 0.00292  | 0.000621 | 0.000158 |

|               |        |      |      |      |      |          |          |          |          |
|---------------|--------|------|------|------|------|----------|----------|----------|----------|
| Tsc22d1       | 21807  | 1.74 | 1.76 | 1.94 | 1.96 | 0.0124   | 0.011    | 0.00369  | 0.00326  |
| Hirip3        | 233876 | 1.68 | 1.74 | 1.7  | 1.76 | 2.51E-05 | 1.19E-05 | 2.14E-05 | 1.02E-05 |
| Mrpl12        | 56282  | 1.5  | 1.74 | 1.54 | 1.78 | 0.00504  | 0.000375 | 0.00325  | 0.000243 |
| Stap1         | 56792  | 1.83 | 1.74 | 2.1  | 2    | 0.00146  | 0.00286  | 0.000224 | 0.000435 |
| Cdca8         | 52276  | 1.55 | 1.74 | 1.86 | 2.09 | 0.0233   | 0.00567  | 0.00251  | 0.000583 |
| Ears2         | 67417  | 1.53 | 1.74 | 1.52 | 1.73 | 0.0365   | 0.00904  | 0.0385   | 0.00957  |
| Frat2         | 212398 | 1.67 | 1.73 | 1.87 | 1.93 | 1.07E-05 | 5.07E-06 | 8.40E-07 | 4.28E-07 |
| Ngfrap1       | 12070  | 1.56 | 1.73 | 1.89 | 2.1  | 0.000119 | 1.11E-05 | 1.70E-06 | 2.20E-07 |
| Tkt           | 21881  | 1.64 | 1.73 | 1.83 | 1.93 | 0.00421  | 0.00196  | 0.000857 | 4.00E-04 |
| Utp11l        | 67205  | 1.6  | 1.72 | 1.53 | 1.64 | 3.41E-07 | 4.34E-08 | 1.36E-06 | 1.53E-07 |
| Il12a         | 16159  | 1.6  | 1.72 | 3.13 | 3.36 | 2.76E-05 | 5.07E-06 | 1.11E-10 | 4.18E-11 |
| Gpr84         | 80910  | 1.53 | 1.72 | 3.08 | 3.46 | 0.00168  | 0.000185 | 1.81E-08 | 4.09E-09 |
| Gse1          | 382034 | 1.67 | 1.72 | 1.63 | 1.67 | 0.000448 | 0.000273 | 0.000753 | 0.000458 |
| Sae1          | 56459  | 1.56 | 1.72 | 1.79 | 1.97 | 0.00253  | 0.00046  | 0.000233 | 4.47E-05 |
| Mybbp1a       | 18432  | 1.66 | 1.72 | 1.77 | 1.83 | 0.00443  | 0.00289  | 0.00185  | 0.0012   |
| 2210013O21Rik | 70123  | 1.83 | 1.71 | 2.53 | 2.35 | 3.41E-06 | 1.58E-05 | 8.72E-09 | 2.84E-08 |
| Ivns1abp      | 117198 | 1.64 | 1.71 | 1.58 | 1.65 | 0.000225 | 9.89E-05 | 0.000455 | 0.000198 |
| Ctsg          | 13035  | 1.51 | 1.71 | 5.71 | 6.48 | 0.0302   | 0.00674  | 1.34E-08 | 4.73E-09 |
| Lcn2          | 16819  | 2.19 | 1.71 | 9.28 | 7.25 | 0.0015   | 0.0191   | 4.78E-09 | 2.76E-08 |
| Rab32         | 67844  | 1.55 | 1.7  | 2.44 | 2.68 | 0.0276   | 0.00944  | 0.000124 | 4.22E-05 |
| Ccdc22        | 54638  | 1.64 | 1.69 | 1.7  | 1.74 | 6.33E-07 | 3.04E-07 | 2.59E-07 | 1.28E-07 |
| Creg1         | 433375 | 1.81 | 1.69 | 1.85 | 1.73 | 1.56E-06 | 7.49E-06 | 8.73E-07 | 4.05E-06 |
| Slc7a11       | 26570  | 2.39 | 1.69 | 2.58 | 1.82 | 2.85E-06 | 0.000775 | 9.74E-07 | 0.000221 |
| Fkbp9         | 27055  | 1.58 | 1.68 | 1.86 | 1.98 | 4.42E-07 | 7.12E-08 | 5.25E-09 | 1.18E-09 |
| Luc7l         | 66978  | 1.63 | 1.68 | 1.52 | 1.57 | 0.000101 | 5.43E-05 | 0.000474 | 0.00025  |
| Rrp15         | 67223  | 1.55 | 1.68 | 1.78 | 1.93 | 0.00419  | 0.00118  | 0.00044  | 0.000126 |
| Phlda1        | 21664  | 1.99 | 1.68 | 2.03 | 1.72 | 0.000346 | 0.00359  | 0.000254 | 0.00263  |
| Il11ra1       | 16157  | 1.61 | 1.68 | 1.73 | 1.81 | 0.0111   | 0.00626  | 0.00419  | 0.00234  |
| Kdelc1        | 72050  | 1.76 | 1.67 | 1.95 | 1.85 | 5.05E-08 | 1.99E-07 | 4.65E-09 | 1.58E-08 |
| Ttc3          | 22129  | 1.62 | 1.67 | 1.89 | 1.95 | 3.37E-06 | 1.55E-06 | 7.68E-08 | 3.95E-08 |

|                    |        |      |      |      |      |          |          |          |          |
|--------------------|--------|------|------|------|------|----------|----------|----------|----------|
| Megf10             | 70417  | 1.76 | 1.67 | 1.83 | 1.73 | 0.000184 | 0.000497 | 0.000101 | 0.000269 |
| D19Bwg1357e        | 52874  | 1.81 | 1.67 | 1.78 | 1.64 | 0.000301 | 0.00115  | 0.000396 | 0.00151  |
| Ccdc58             | 381045 | 1.66 | 1.66 | 1.81 | 1.81 | 3.32E-05 | 3.27E-05 | 5.08E-06 | 5.01E-06 |
| Sgms1              | 208449 | 1.51 | 1.66 | 2.28 | 2.51 | 0.00943  | 0.00225  | 1.94E-05 | 5.24E-06 |
| Pdgfb              | 18591  | 1.5  | 1.66 | 1.55 | 1.71 | 0.0143   | 0.00333  | 0.00926  | 0.00213  |
| Cdc20              | 107995 | 1.64 | 1.65 | 1.72 | 1.73 | 0.000263 | 0.000231 | 0.000101 | 8.90E-05 |
| Prep               | 19072  | 1.55 | 1.65 | 1.7  | 1.81 | 0.000934 | 0.000285 | 0.000158 | 4.99E-05 |
| Gfer               | 11692  | 1.81 | 1.65 | 2.14 | 1.95 | 0.000109 | 0.000587 | 6.13E-06 | 2.92E-05 |
| Banf1              | 23825  | 1.7  | 1.65 | 1.57 | 1.53 | 0.0038   | 0.00562  | 0.0107   | 0.0156   |
| Tubb5              | 22154  | 1.53 | 1.65 | 1.95 | 2.1  | 0.0162   | 0.00613  | 0.000627 | 0.000233 |
| Sumo3              | 20610  | 1.62 | 1.63 | 1.61 | 1.63 | 1.12E-05 | 9.47E-06 | 1.16E-05 | 9.80E-06 |
| Vdac1              | 22333  | 1.61 | 1.63 | 1.77 | 1.79 | 8.64E-05 | 6.90E-05 | 1.12E-05 | 9.10E-06 |
| Fam63a             | 75007  | 1.72 | 1.63 | 2.5  | 2.37 | 0.000927 | 0.00226  | 3.00E-06 | 6.55E-06 |
| 6430706D22Rik      | 381280 | 1.52 | 1.63 | 1.9  | 2.03 | 0.00912  | 0.00334  | 0.000323 | 0.000119 |
| 1500011K16Rik      | 67885  | 1.67 | 1.62 | 1.74 | 1.69 | 1.45E-06 | 3.09E-06 | 5.33E-07 | 1.10E-06 |
| Slc6a13            | 14412  | 1.5  | 1.62 | 2.06 | 2.23 | 0.00109  | 0.000211 | 1.82E-06 | 4.63E-07 |
| Zranb2             | 53861  | 1.67 | 1.62 | 1.85 | 1.8  | 0.00077  | 0.00129  | 0.000125 | 0.000207 |
| Rps27a             | 78294  | 1.5  | 1.62 | 1.5  | 1.62 | 0.00842  | 0.00232  | 0.00867  | 0.00239  |
| Fem1b              | 14155  | 1.55 | 1.61 | 1.6  | 1.67 | 4.84E-05 | 1.78E-05 | 2.11E-05 | 7.95E-06 |
| E2f6               | 50496  | 1.65 | 1.61 | 1.93 | 1.88 | 4.23E-05 | 7.69E-05 | 1.57E-06 | 2.68E-06 |
| ENSMUSG00000069996 | 1E+08  | 1.51 | 1.61 | 1.65 | 1.75 | 0.00533  | 0.00196  | 0.00129  | 0.000472 |
| Rsl1d1             | 66409  | 1.56 | 1.61 | 1.67 | 1.72 | 0.00453  | 0.00285  | 0.00165  | 0.00104  |
| Hspa9              | 15526  | 1.9  | 1.61 | 2.05 | 1.74 | 0.000217 | 0.00292  | 6.40E-05 | 0.000831 |
| Mrvi1              | 17540  | 1.72 | 1.61 | 1.64 | 1.54 | 0.00406  | 0.00933  | 0.00769  | 0.0174   |
| Saa3               | 20210  | 1.74 | 1.61 | 10.2 | 9.45 | 0.057    | 0.0965   | 1.21E-07 | 1.95E-07 |
| Dazap1             | 70248  | 1.56 | 1.6  | 1.54 | 1.58 | 4.63E-06 | 2.11E-06 | 6.73E-06 | 3.03E-06 |
| Robo3              | 19649  | 1.58 | 1.6  | 1.58 | 1.6  | 2.77E-05 | 2.11E-05 | 2.84E-05 | 2.16E-05 |
| Klhl6              | 239743 | 1.57 | 1.6  | 2.49 | 2.54 | 0.00172  | 0.00121  | 8.31E-07 | 6.26E-07 |
| Nob1               | 67619  | 1.57 | 1.6  | 1.62 | 1.65 | 0.00177  | 0.00137  | 0.00101  | 0.00078  |
| Ptpn11             | 19247  | 1.65 | 1.59 | 1.74 | 1.68 | 0.000328 | 0.000659 | 0.000106 | 0.000211 |

|               |        |      |      |      |      |          |          |          |          |
|---------------|--------|------|------|------|------|----------|----------|----------|----------|
| Farsb         | 23874  | 1.64 | 1.58 | 1.84 | 1.78 | 4.00E-05 | 9.03E-05 | 2.93E-06 | 6.19E-06 |
| Prodh         | 19125  | 1.58 | 1.58 | 1.66 | 1.67 | 0.000152 | 0.000138 | 4.78E-05 | 4.36E-05 |
| Cirh1a        | 21771  | 1.58 | 1.58 | 1.5  | 1.5  | 0.000484 | 0.000494 | 0.00146  | 0.00149  |
| Anln          | 68743  | 1.6  | 1.58 | 1.75 | 1.73 | 0.000533 | 0.000682 | 9.85E-05 | 0.000125 |
| 5730528L13Rik | 66665  | 1.57 | 1.57 | 1.8  | 1.8  | 7.14E-05 | 6.85E-05 | 2.94E-06 | 2.83E-06 |
| Bub1b         | 12236  | 1.6  | 1.57 | 1.73 | 1.7  | 4.61E-05 | 7.51E-05 | 7.82E-06 | 1.24E-05 |
| Nup93         | 71805  | 1.61 | 1.57 | 1.78 | 1.73 | 0.000106 | 0.000205 | 1.23E-05 | 2.29E-05 |
| Ruvbl2        | 20174  | 1.62 | 1.57 | 1.73 | 1.68 | 0.000895 | 0.00152  | 0.000272 | 0.000459 |
| Tbxas1        | 21391  | 1.83 | 1.56 | 1.96 | 1.67 | 9.60E-05 | 0.00174  | 3.03E-05 | 0.000517 |
| Sort1         | 20661  | 1.69 | 1.56 | 1.96 | 1.81 | 0.000573 | 0.00228  | 4.47E-05 | 0.000169 |
| Mmrn1         | 70945  | 1.86 | 1.56 | 2.02 | 1.7  | 0.00409  | 0.029    | 0.00154  | 0.0115   |
| EG433923      | 433923 | 1.53 | 1.55 | 1.62 | 1.64 | 0.000126 | 8.66E-05 | 3.28E-05 | 2.28E-05 |
| Htra2         | 64704  | 1.52 | 1.55 | 1.66 | 1.69 | 0.00193  | 0.00128  | 0.00036  | 0.00024  |
| Mrpl38        | 60441  | 1.56 | 1.55 | 1.68 | 1.67 | 0.00222  | 0.00253  | 0.000641 | 0.000727 |
| Rab27b        | 80718  | 1.54 | 1.55 | 1.67 | 1.68 | 0.00312  | 0.00282  | 0.000724 | 0.000655 |
| Slc14a1       | 108052 | 1.55 | 1.55 | 1.56 | 1.57 | 0.0115   | 0.0112   | 0.0101   | 0.00978  |
| F10           | 14058  | 1.61 | 1.55 | 3.86 | 3.71 | 0.166    | 0.202    | 0.000737 | 0.000959 |
| Mgat4b        | 103534 | 1.5  | 1.54 | 1.53 | 1.57 | 0.000248 | 0.00014  | 0.000155 | 8.81E-05 |
| Ptx3          | 19288  | 1.69 | 1.54 | 1.78 | 1.63 | 0.000252 | 0.00144  | 9.04E-05 | 0.000504 |
| Ier3          | 15937  | 1.57 | 1.53 | 1.59 | 1.55 | 0.00595  | 0.00843  | 0.00491  | 0.00696  |
| Gm1964        | 432628 | 1.67 | 1.52 | 1.7  | 1.54 | 3.60E-05 | 0.000342 | 2.69E-05 | 0.000252 |
| Rpl4          | 67891  | 1.67 | 1.52 | 2.23 | 2.03 | 0.000308 | 0.00186  | 1.88E-06 | 9.15E-06 |
| Prmt3         | 71974  | 1.69 | 1.51 | 1.72 | 1.53 | 0.000657 | 0.0046   | 0.000517 | 0.00362  |
| Pa2g4         | 18813  | 1.54 | 1.51 | 1.58 | 1.55 | 0.00972  | 0.013    | 0.00652  | 0.00874  |
| Bbc3          | 170770 | 2.02 | 1.5  | 2.08 | 1.54 | 0.00153  | 0.045    | 0.00112  | 0.0339   |
